# Supplementary material for: Overexpression of the Eggplant (Solanum melongena) NAC Family Transcription Factor SmNAC Suppresses Resistance to Bacterial Wilt
Source: PubMed Central journal article supplement (PMC4985710; doi:10.1038/srep31568), 2016-08-16
Supplement: srep31568-s1.pdf [file srep31568-s1.pdf]

## The title page

The manuscript title:

Overexpression of the Eggplant (*Solanum melongena*) NAC Family Transcription Factor, *SmNAC*, Suppresses Resistance to Bacterial Wilt.

The author list:

1 Cao Bihao: \*Corresponding author

Institution : College of Horticulture, South China Agricultural University

Postcode: 510642

Telephone: +86-2085280228

Fax: +86-20-85282107

E-mail: caobh01@163.com.

2 Chen Na: The first author

Institution: College of Horticulture, South China Agricultural University

Postcode: 510642

E-mail: 976210387@qq.com

3 Wu Shuanghua: The second author

Institution: College of Horticulture, South China Agricultural University

Postcode: 510642

E-mail: 398573280@qq.com

4 Fu Jinglong: The third author

Institution: College of Horticulture, South China Agricultural University

Postcode: 510642

E-mail: 1007674018@qq.com

5 Lei Jianjun: The fifth author

Institution : College of Horticulture, South China Agricultural University

Postcode: 510642, P.R.China

E-mail: jjlei@scau.edu.cn

6 Chen Changming: The sixth author

Institution: College of Horticulture, South China Agricultural University

Postcode: 510642

E-mail: 104845357@qq.com

7 Jiang Jin: The seventh author

Institution: College of Horticulture, South China Agricultural University

Postcode: 510642

E-mail: 921571335@qq.com

(a)

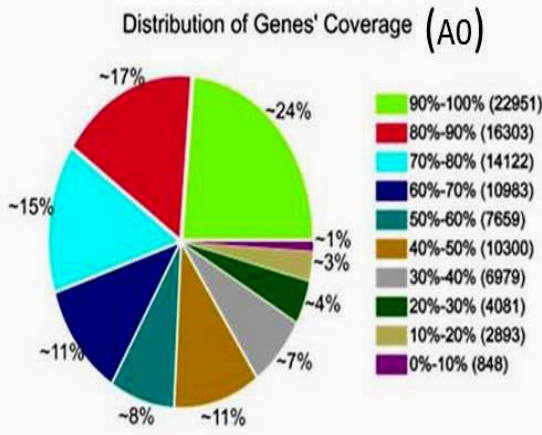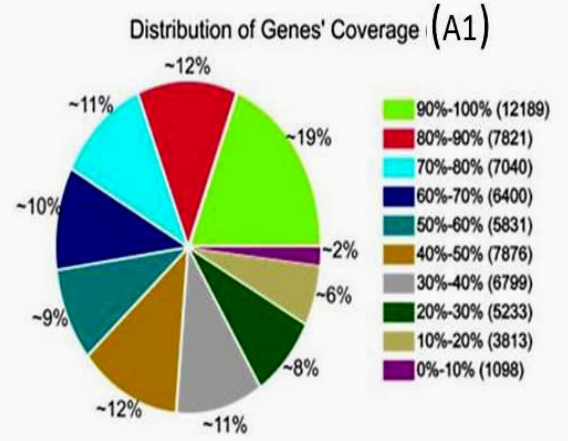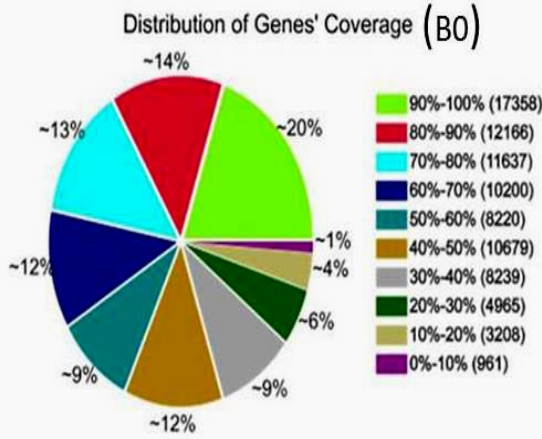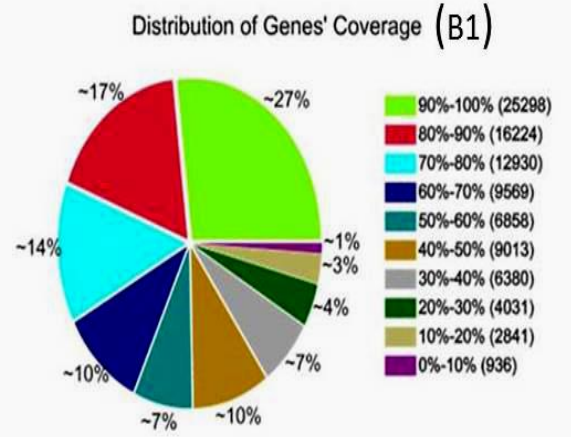

(b)

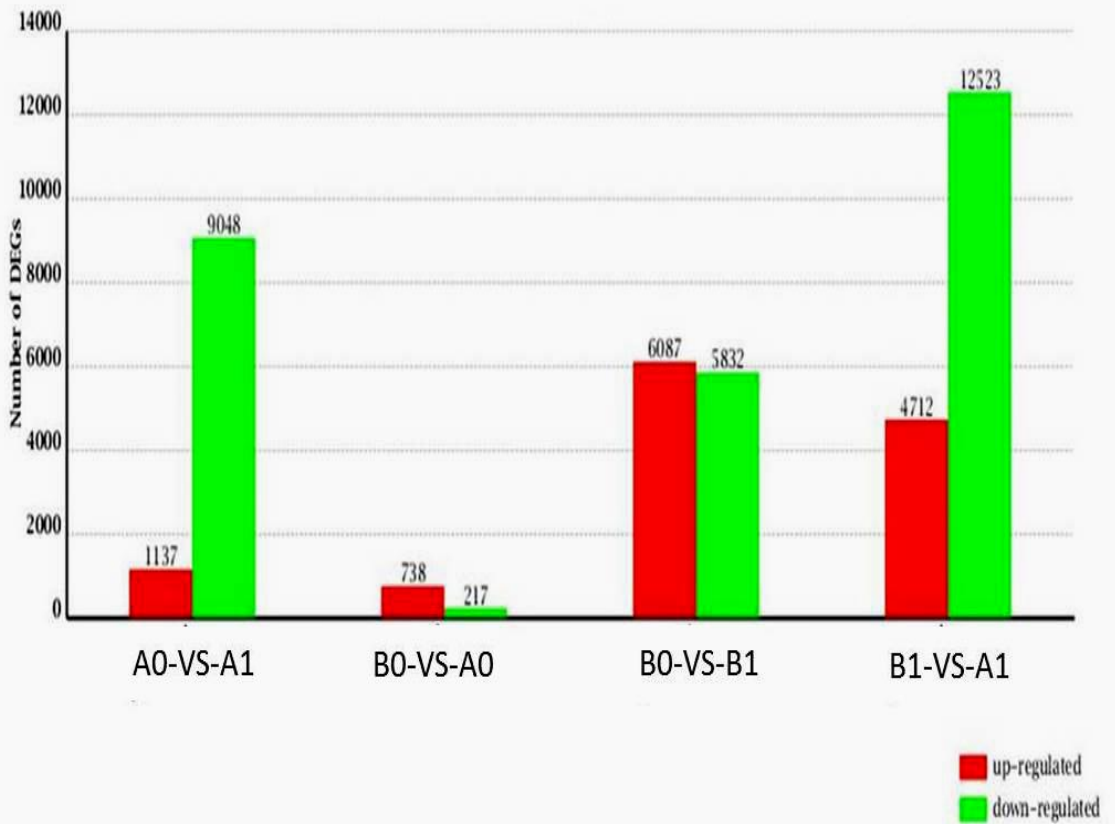

(c)

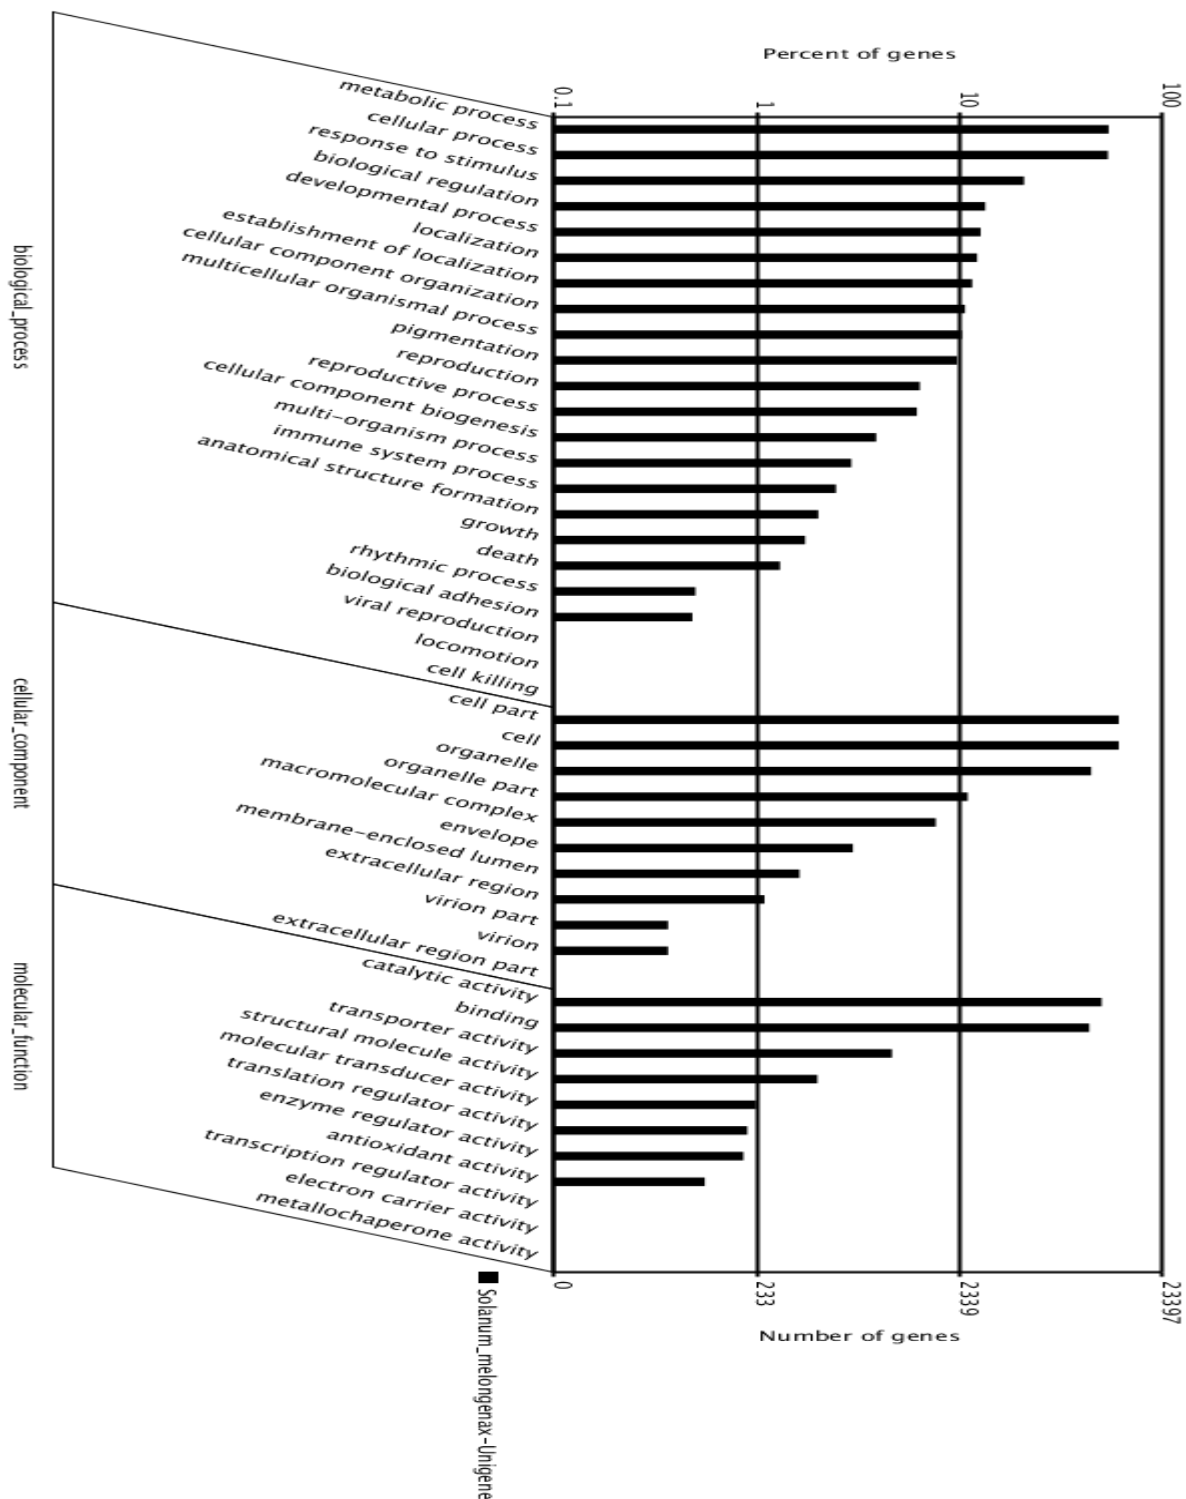

**Fig.S1. Distribution of gene coverage in each RNA-seq library, Differential gene expression analysis and GO-terms.**

RNA-Seq analysis was performed on resistant (E-31) and susceptible (E-32) eggplant lines. Lines A0 and A1 corresponded to mock-inoculated and pathogen-inoculated E-31 plants at 7 days post-inoculation (dpi). Similarly, B0 and B1 correspond to mock-inoculated and pathogen-inoculated E-32 plants at also 7 dpi. RNA was extracted from ten plants stems of each of these four lines and used for RNA-Seq library construction, with 2 replicates for each treatment.

(a) Distribution of gene coverage of each library. (b) Differential gene expression analysis.

(c) Frequency of sequences with assigned Gene Ontology (GO) terms (slimmed) for the category biological process found in the stem tissue assemblies.

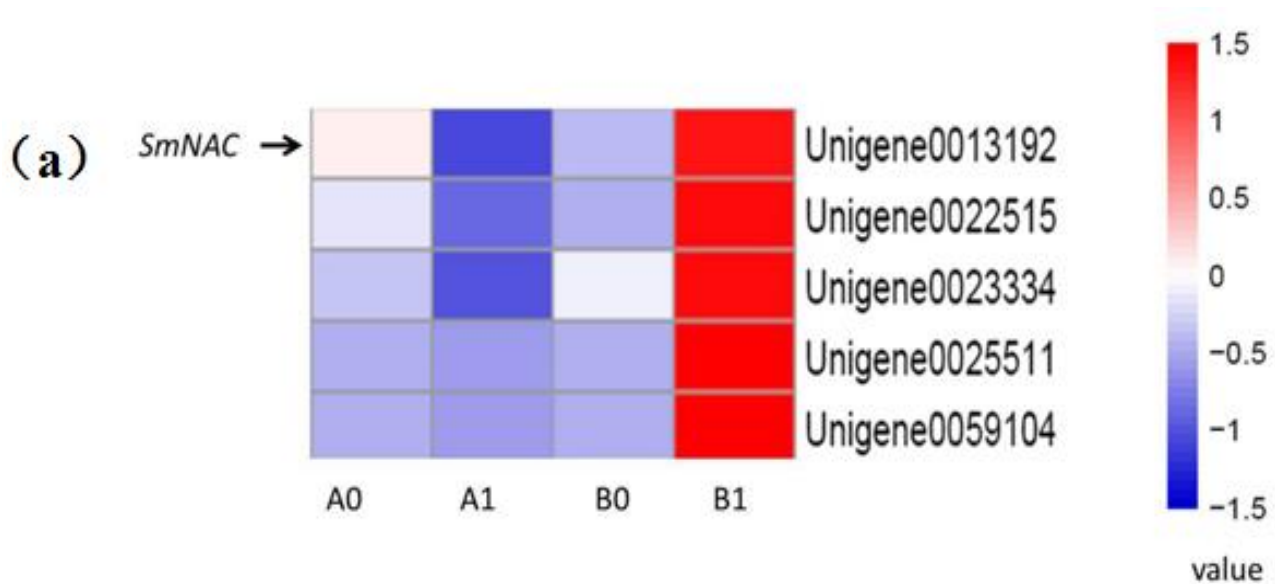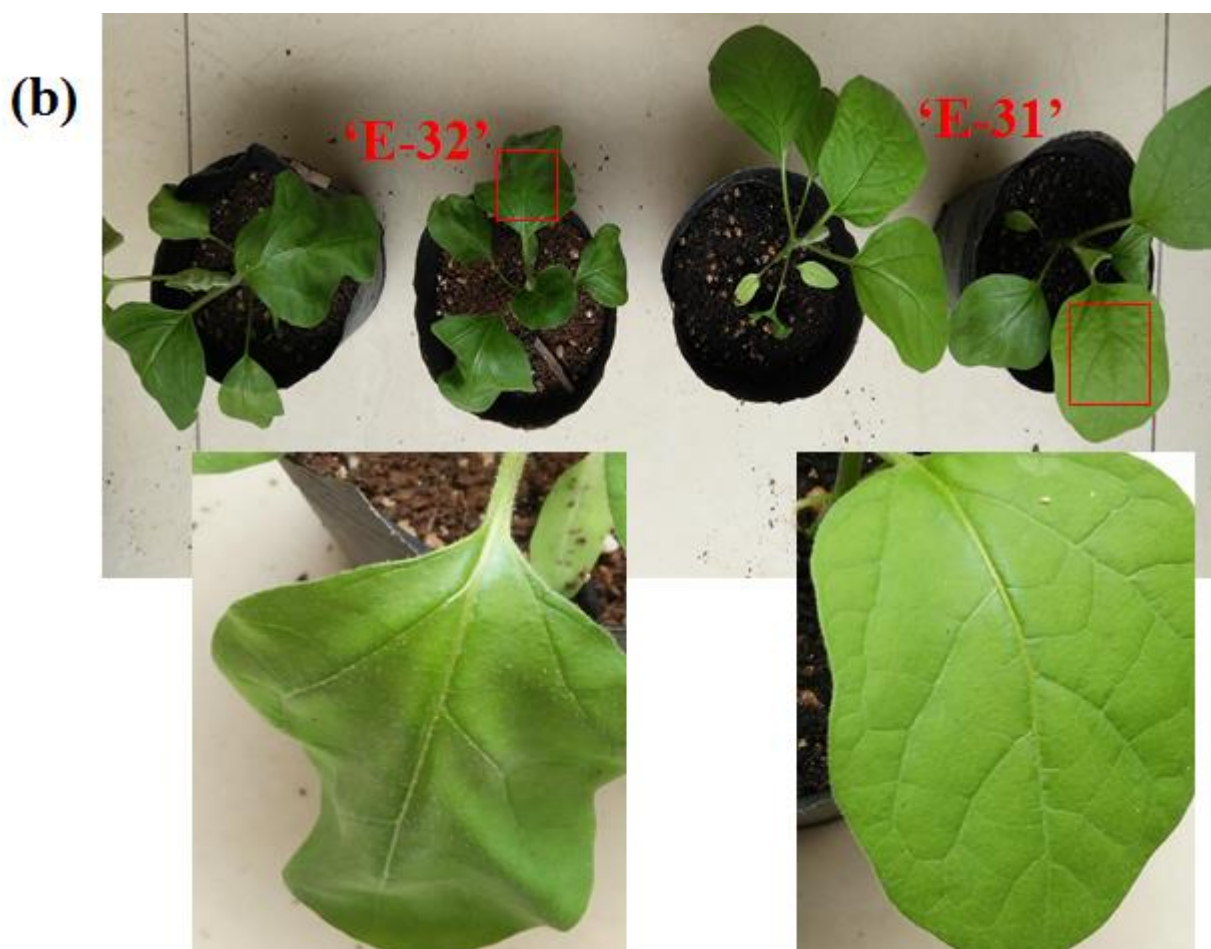

**Fig.S2. The heat maps depict the expression patterns of *SmNAC* in resistant plant and susceptible plant, and the phenotypic symptoms of susceptible plants after inoculation with *Ralstonia solanacearum*.**

(a): The heat maps depict the expression patterns of *SmNAC* in resistant plant and susceptible plant. Heat-map values represent log-transformed relative expression values.

A0 and A1 corresponded to mock-inoculated and pathogen-inoculated E-31 plants, 7 days post-inoculation (dpi). B0 and B1 correspond to mock-inoculated and pathogen-inoculated E-32 plants, also 7 dpi. Arrow showing the expression level of *SmNAC*.

(b): The phenotypic symptoms of eggplants after 15 days inoculation with *Ralstonia solanacearum*. 'E-32': susceptible plant; 'E-31': resistant plant.



**Fig.S3. A phylogenetic tree including *SmNAC* and related proteins.**

Phylogenetic tree of NAC proteins (black circles). Protein sequences were aligned with those of the *A. thaliana* and rice NAC families. A multiple sequence alignment was carried out using CLUSTALW, and the phylogenetic tree was constructed in MEGA6.0 using the minimum evolution test and default parameters. Bootstrap values indicate the divergence of each branch and the scale indicates branch length. The full-length amino acid sequences of the ANAC proteins were obtained from the Plant Transcription Factor Database (<http://planttfdb.cbi.pku.edu.cn/family.php?sp=Ath&fam=NAC>) and the full length amino acid sequences of the ONAC proteins were obtained from the Rice genome annotation project (<http://rice.plantbiology.msu.edu>). Full length sequences were used in the analysis.



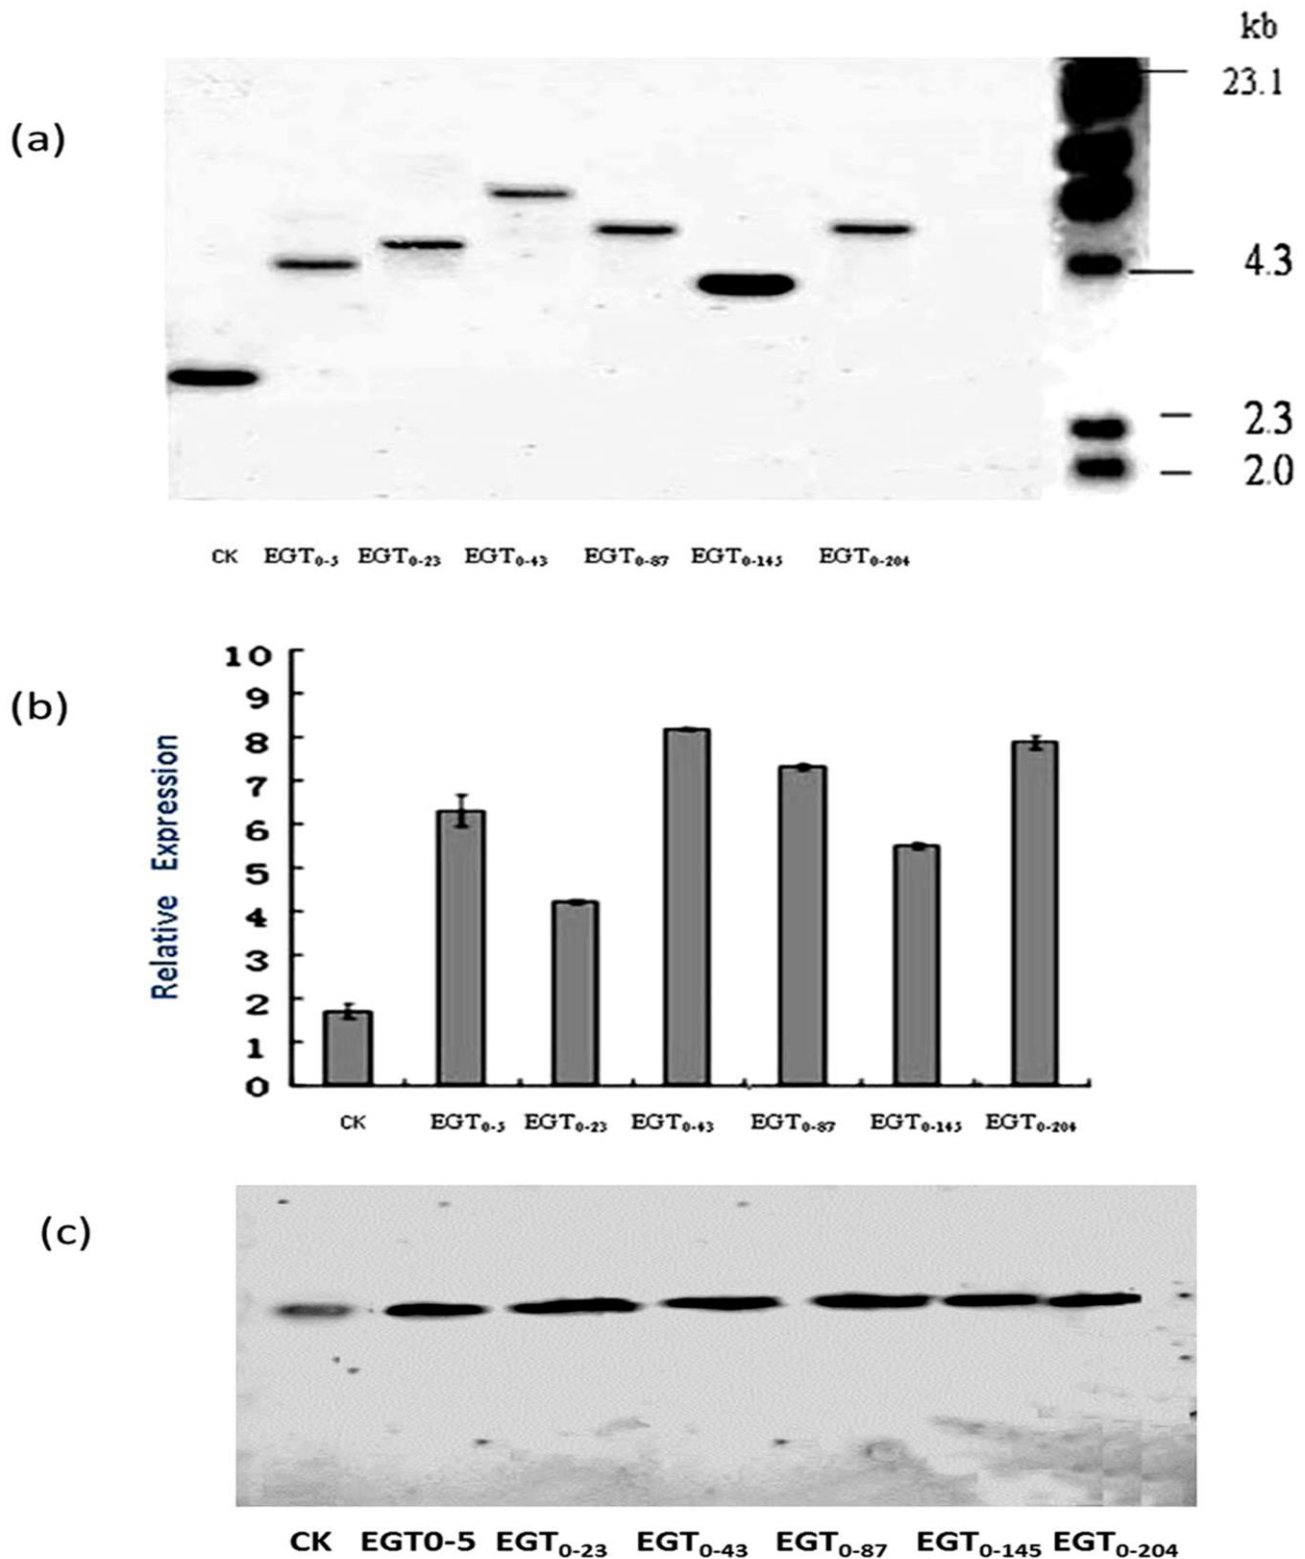

**Fig.S4. Southern blot, qRT-PCR and Western blot analyses of *SmNAC* in *SmNAC*-overexpressing plants.**

(a) Genomic DNA from transgenic Km-resistant plants was digested with *Hind*III, and a *NPT-II* gene fragment was used as a probe. CK: pBI-*SmNAC*. (b) qRT-PCR analysis of *SmNAC* expression in transgenic plants using the primers: F-P1 5'-GAAAATTAGAAAGATTACAAC-3' and R-P1 5'-TAAAAGAATATACATGTCCCT-3'. CK: Non-transgenic plant from the 'E-31' line. (c) Western blot detection of *SmNAC* in overexpression transgenic plants, anti-*SmNAC* was used as the probe. CK: Non-transgenic plant from the 'E-31' line; EGT<sub>0-5</sub>, EGT<sub>0-23</sub>, EGT<sub>0-43</sub>, EGT<sub>0-87</sub>, EGT<sub>0-145</sub>, and EGT<sub>0-204</sub> represent the *SmNAC*-overexpression plants.

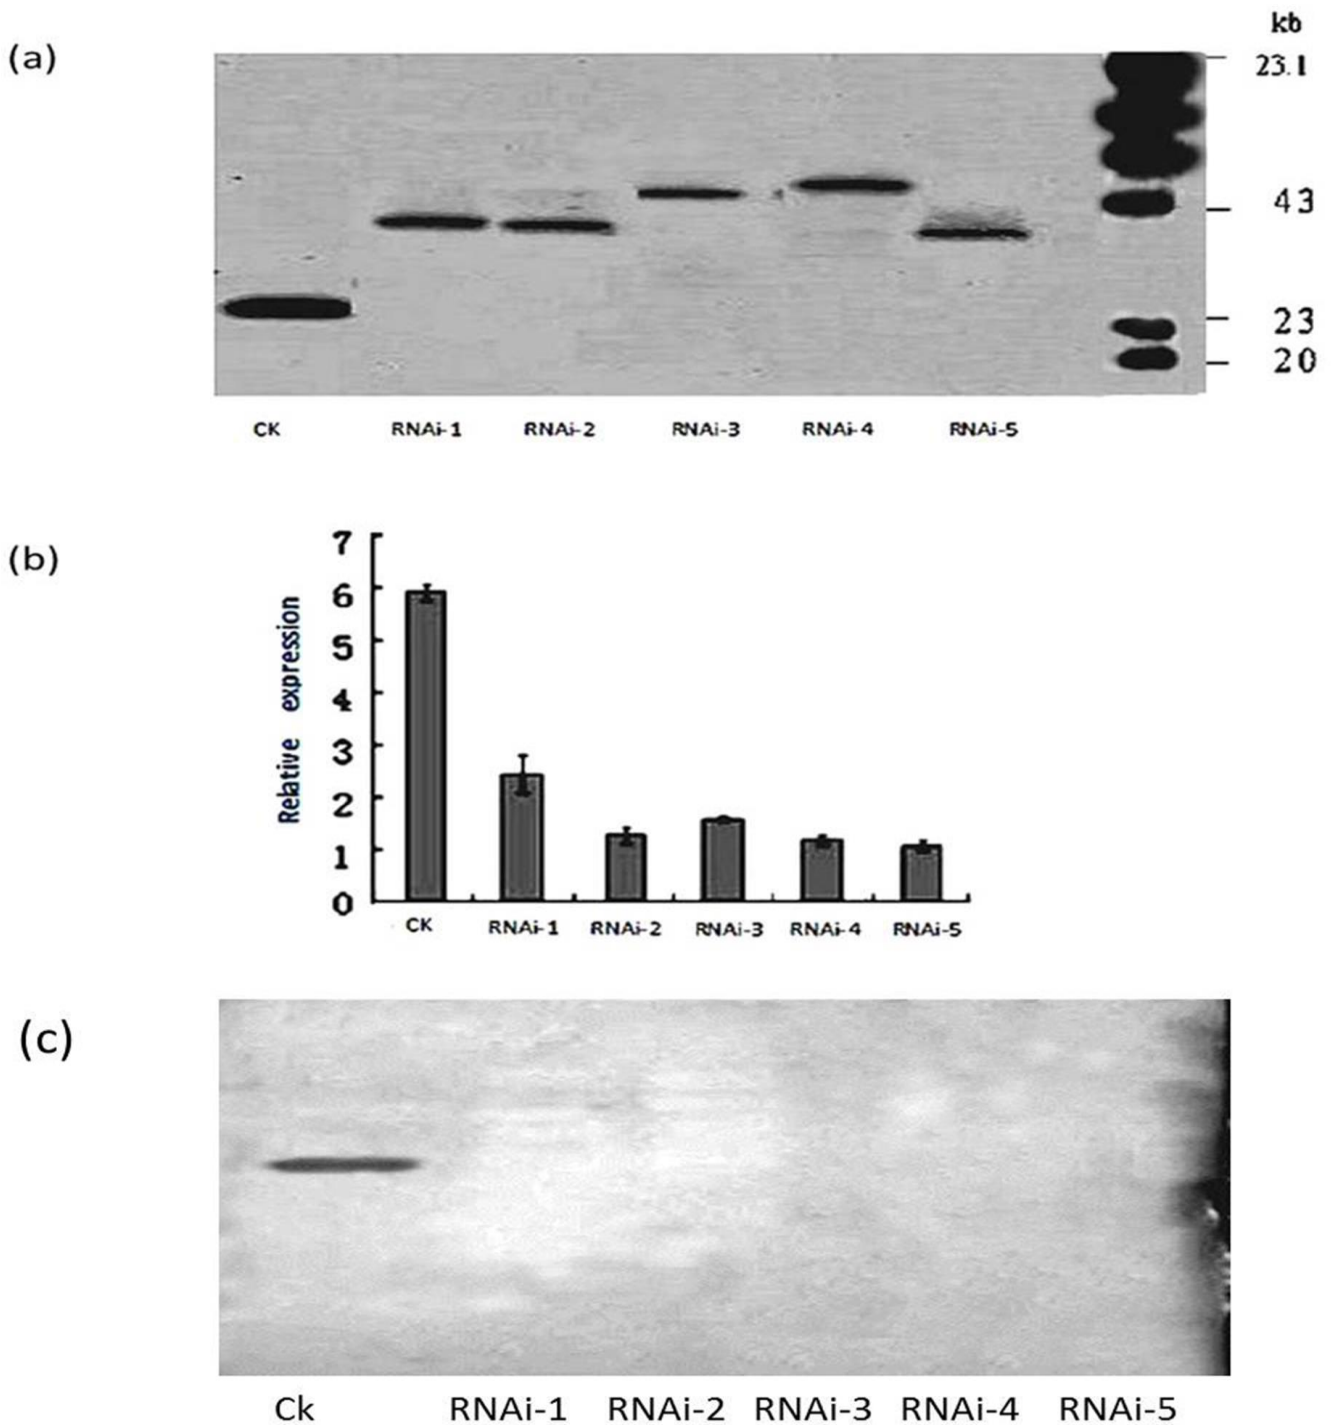

**Fig.S5. Southern blot, qRT-PCR and Western blot analysis of expression of *SmNAC* in RNAi-*SmNAC* plants.**

(a) Genomic DNA from the resistant transgenic plants was digested with *Hind* III, and *Bar* gene fragments were used as a probe. CK: pFGC5941-*SmNAC*. (b) qRT-PCR analysis of *SmNAC* in transgenic plants using the primers: F-P1 5'-GAAAATTAGAAAGATTACAAC-3' and R-P1 5'-TAAAAGAATATACATGTCCT-3'. CK: Non-transgenic plants from the 'E-32' line. (c) Western blot detection of *SmNAC* RNAi transgenic plant, anti-*SmNAC* was used as the probe. CK: Non-transgenic plants from the 'E-32' line; RNAi-1, RNAi-2, RNAi-3, RNAi-4, and RNAi-5 represent the *SmNAC*-RNAi transgenic plants.



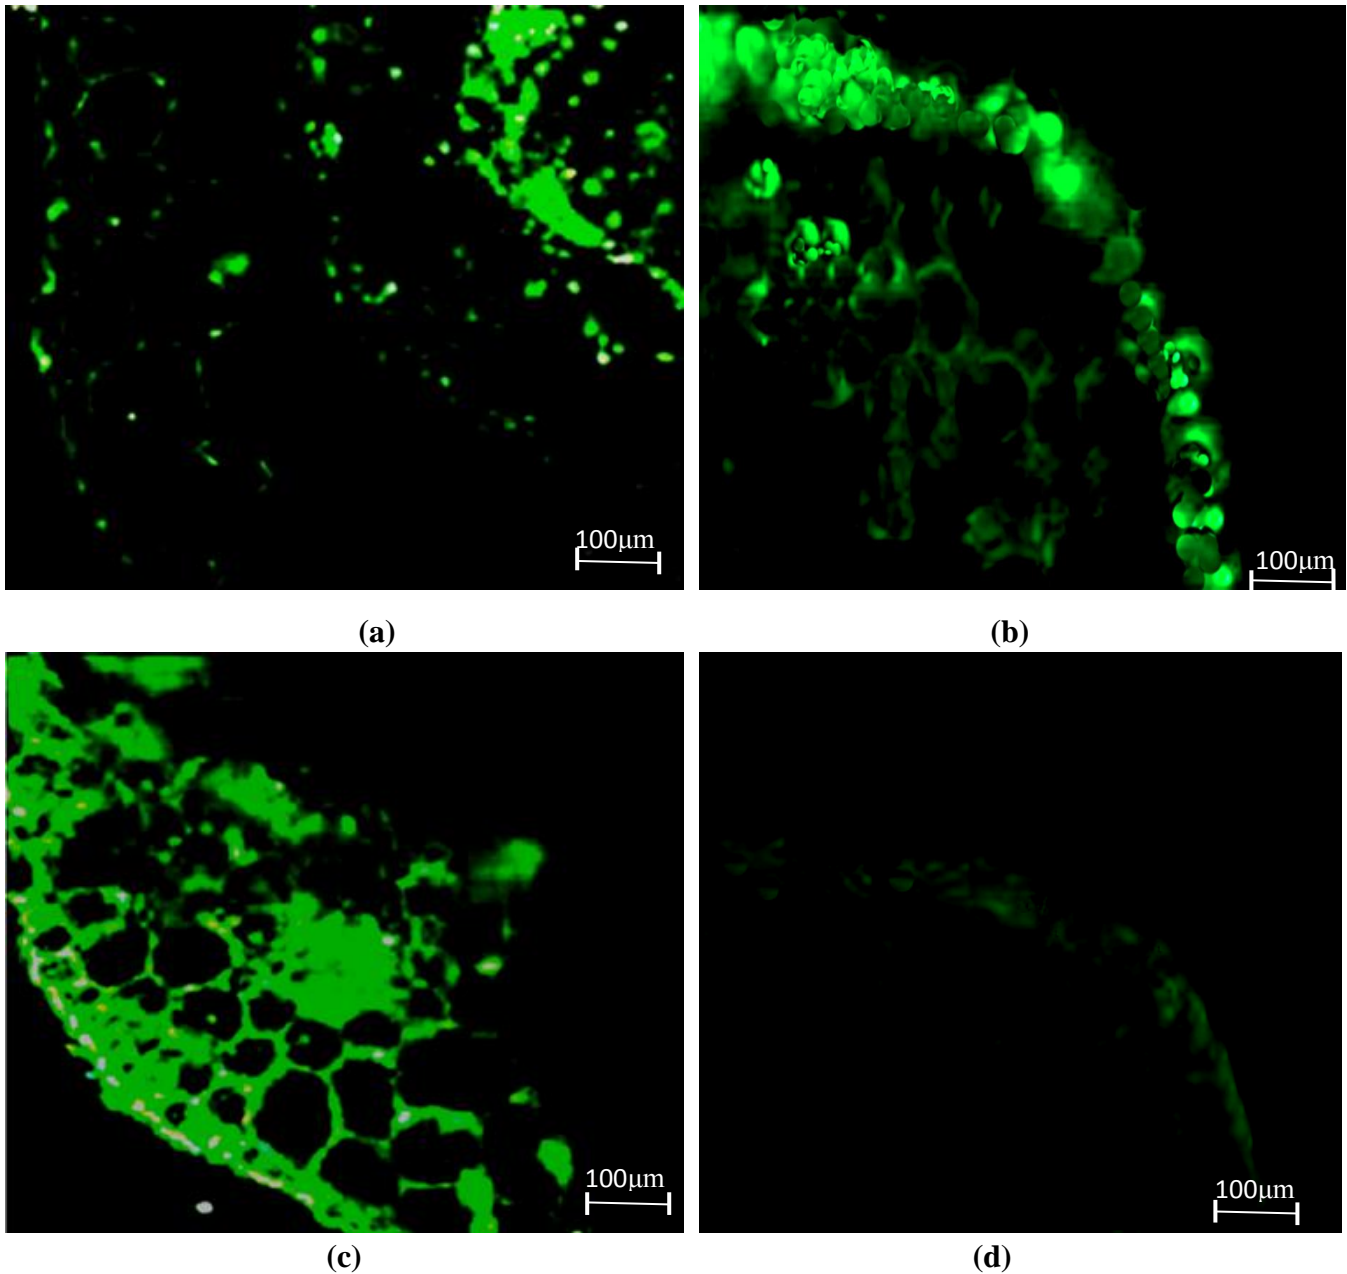

**Fig.S6. Immunohistochemical localization analysis of *SmNAC* in *SmNAC*-overexpressing and *SmNAC*-RNAi transgenic plants.**

Fresh *S. melongena* stem tissues were used, and cross-sections of eggplant tissue labeled with purified *SmNAC* antibodies and visualized using an anti-rabbit IgG conjugated to green fluorescent protein. Scale bars, 100µm. Each experiment repeated three times.

- (a) *SmNAC* protein distribution in the stem of a non-transgenic plant (E-31);
- (b) *SmNAC* protein distribution in the stem of a *SmNAC*-overexpressing plant ( EGT<sub>1-87</sub>);
- (c) *SmNAC* protein distribution in the stem of a non-transgenic plant (E-32);
- (d) *SmNAC* protein distribution in the stem of a *SmNAC*-RNAi transgenic plant (RNAi-2-1).

**TableS1 primer sequence of qRT-PCR**

| Gene name    | Forward(5'-3')                 | Reverse(5'-3')                | Gen Bank accession |
|--------------|--------------------------------|-------------------------------|--------------------|
| <i>Pin2</i>  | TGATGCCAAGGCTTGTACTAGAGA       | AGCGGACTTCCTTCTGAACGT         | AY129402           |
| <i>JAR1</i>  | GCAGCTATGGGGTTTGAATGGCAGA      | AAGAGGTCAGGAATCAAGCCGTACC     | DQ359730.1         |
| <i>LoxA</i>  | GACCAAAACGCTCGTCTCTC           | TGGTAGACCACCAACACGAA          | U09026             |
| <i>EDS1</i>  | GTTCGCAGACAAGTTGAGCC           | CTCTGTGTGAACCGATAACGC         | AY679160.1         |
| <i>GluA</i>  | GCCGACTGGGTGAGATGGTAA          | ACATTGTTGTGCCCGTGGAC          | M80604             |
| <i>NPR1</i>  | CTTGGACTGGGTGTTGCTAATG         | TGCCCATCCAATGTAATGTCTG        | NM_001247633.1     |
| <i>TGA</i>   | GCAAGTGACCCTGAACTACGAAG        | GGGTTTTCCACATCCCTGACAAG       | GQ386946.1         |
| <i>SGT1</i>  | TTCTCGGTTTTGAGGAAGGG           | GCAGATACCAAGTGATGTCTACCA      | NM_001247758.1     |
| <i>PAD4</i>  | ACATCGGCTGAAACCTCCTTATT        | TTTGATAAGTGGTGGGGAAATGA       | AY753546.1         |
| <i>PR-1a</i> | GAGGGCAGCCGTGCAA               | CACATTTTTCCACCAACACATTG       | M69247             |
| <i>EIN2</i>  | GGGACGAACGGGCACTGCAGCA         | GTGATGAGGCAGACAGCGTTACT       | AY566238           |
| <i>EIL1</i>  | TTGAACGACAGCCCTGAGTATG         | AGGTGTCCAGTTCTTTCTTTGTTTCG    | NM_001247612.1     |
| <i>ICS1</i>  | GCATGGGACAATGCTGCTGCCTCATGGA   | TCTGGTGCTACGAGCAAGTACCACCT    | NM_001247865.1     |
| <i>PBS3</i>  | GTTTGCACTATGTATGCTTCCTCTG      | GCTCATACTCCTGACCAATCTTgtcGACA | XM_004251437.2     |
| <i>BSMT1</i> | TATGAGTGGGAACCTTTTTGGCTACGACGC | GCCATATCGTATTTTCATCATCACAAAG  | XM_004237341.1     |
| <i>SAGT1</i> | GCCTTCGTTTATTACGTACATGGAACG    | CCACATGGAATAGATTGAGACCATAC    | XM_004245012.1     |
| <i>ACTIN</i> | TATTGTGGGTCGTCCTCG             | TCTCTCTGTTGGCCTTGG            | XM_016658880.1     |

**TableS2 Primer sequences used for promoter isolation**

| Primer | Sequence of primer                                    |
|--------|-------------------------------------------------------|
| LAD1   | 5'-ACGATGGACTCCAGAGNTCGA(G/C)T(A/T)T(G/C)G(A/T)GTT-3' |
| LAD2   | 5'--ACGATGGACTCCAGAG NGTCGA(G/C)(A/T)GANA(A/T)GAA-3'  |
| LAD3   | 5'--ACGATGGACTCCAGAG (A/T)TCTGNCT(A/T)ANTANCT-3'      |
| LAD4   | 5'--ACGATGGACTCCAGAG AG(A/T)GNAG(A/T)ANCA(A/T)AGG-3'  |
| AC1    | 5'-ACGATGGACTCCAGAG-3'                                |
| SP1    | 5'-AGGATCGGACTTAATCATATCGGAGATGGC-3'                  |
| SP2    | 5'-GCAGGGCTAGAAACTGCAGGCAAAGT-3'                      |
| SP3    | 5'-CCAATAGGAGCTCTTGAATCGCCTTGGCA-3'                   |

**TableS3 Main regulatory motifs found within the promoter sequence of *ICS1* in eggplant**

| Factor or site name    | Site                                                                              | Signal sequence   | Function                                                            |
|------------------------|-----------------------------------------------------------------------------------|-------------------|---------------------------------------------------------------------|
| <b>ABRE</b>            | 167(+),1350(+)                                                                    | CACGTG            | cis-acting element involved in the abscisic acid responsiveness     |
| <b>AE-box</b>          | 881(-)                                                                            | AGAAACAT          | part of a module for light response                                 |
| <b>ARE</b>             | 1134(-)                                                                           | TGGTTT            | cis-acting regulatory element essential for the anaerobic induction |
| <b>ATCT-motif</b>      | 501(+)                                                                            | AATCTAATCT        | part of a conserved DNA module involved in light responsiveness     |
| <b>Box-4</b>           | 343(+),265(+)                                                                     | ATTAAT            | part of a conserved DNA module involved in light responsiveness     |
| <b>Box -I</b>          | 9(-),846(-),<br>615(+),1075(+)                                                    | TTTCAAA           | light responsive element                                            |
| <b>ERE</b>             | 125 (-) ,1389(-)                                                                  | ATTTCAAA          | ethylene-responsive element                                         |
| <b>CAAT-box</b>        | 109(+),316(+)                                                                     | CAAT              | common cis-acting element in promoter and enhancer regions          |
| <b>CAT-box</b>         | 471(+),936(+),<br>1138(+),1323(+)<br>1336(+)                                      | GCCACT            | cis-acting regulatory element related to meristem expression        |
| <b>EIRE</b>            | 125(-),1389(-)                                                                    | TTCGACC           | elicitor-responsive element                                         |
| <b>G-Box</b>           | 167(+), 956(+),<br>1350(+)                                                        | CACGTG,<br>CACGTT | cis-acting regulatory element involved in light responsiveness      |
| <b>HD-Zip 1</b>        | 37(+)                                                                             | CAAT(A/T)ATTG     | element involved in differentiation of the palisade mesophyll cells |
| <b>HSE</b>             | 73(+),998(+), ,<br>1150(+)                                                        | AAAAAATTTC        | cis-acting element involved in heat stress responsiveness           |
| <b>Skn-1motif</b>      | 136(+),495(-)                                                                     | GTCAT             | cis-acting regulatory element required for endosperm expression     |
| <b>TATA-box</b>        | 69(+),145(+),<br>242(+),386(+),489(+),<br>642(+),789(-),908(-),<br>116(-),1163(+) | TATAA             | core promoter element around -30 of transcription start             |
| <b>TC-rich repeats</b> | 928(+)                                                                            | ATTTTCTTCA        | cis-acting element involved in defense and stress responsiveness    |
| <b>WUN-motif</b>       | 808(-)                                                                            | AAATTCCT          | wound-responsive element                                            |
| <b>Circadian</b>       | 618(+)                                                                            | CAAAGATATC        | cis-acting regulatory element involved in circadian control         |
| <b>CACG</b>            | 364(+),427(+),<br>681(+),1152(+),<br>1190(+), 1547(+)                             | CACG              | core binding site of NAC factor domain                              |
